# Supplementary material
Source: MDPI journal article supplement (https://www.mdpi.com/2073-4433/13/7/1046)
Supplement: s1 [file s1]

# Supplementary Materials: Exploring Non-Linear Dependencies in Atmospheric Data with Mutual Information

Petri Laarne <sup>1,2</sup> , Emil Amnell <sup>1</sup> , Martha Arbayani Zaidan <sup>1,3</sup> , Santtu Mikkonen <sup>4,5</sup>   
and Tuomo Nieminen <sup>1,6,\*</sup> 

## 1. Derivations of Theoretical Results

### 1.1. Transformation Invariance

Let us recall that entropy is defined by the integral

$$H(X) = - \int_{-\infty}^{\infty} p(x) \log p(x) dx,$$

and mutual information by

$$I(Y; X) = H(X) + H(Y) - H(X, Y).$$

We can combine these two to get the alternative definition

$$I(Y; X) = \int_{-\infty}^{\infty} p(x, y) \log \left[ \frac{p(x, y)}{p(x)p(y)} \right] dx dy.$$

The probability densities satisfy  $p(x, y) = p(x, f(y))J(x, y)$ , where  $J$  is the Jacobian determinant of  $f$ . This means that any change of variable  $y \mapsto f(y)$  cancels out. Here,  $f$  must be bijective, differentiable and have differentiable inverse. In practice, most transformations are in this category.

In fact,  $f$  only needs to be bijective, measurable and have a measurable inverse [1] (Theorem 1.6.3). The idea is to partition the space  $f(Y)$  and observe that the preimages form a probability-preserving partitioning of the original space  $Y$ . This equality is preserved in the supremum over all partitionings.

Given suitable symmetry, even some periodicity can be removed. For example, the “date  $\mapsto$  day of year” transformation loses no information if years are independent of each other. This is illustrated in Figure 1a of the article, where the  $x$  variable is uniformly distributed across the whole interval.

### 1.2. MI Correlation Coefficient

Let us consider a two-dimensional Gaussian random variable  $(X, Y) \sim \text{Normal}(0, \Sigma)$  with a covariance matrix

$$\Sigma = \begin{bmatrix} 1 & \rho \\ \rho & 1 \end{bmatrix}.$$

We may assume zero mean and unit marginal variance by the transformation invariance.

The entropy of an  $n$ -dimensional Gaussian random variable depends only on the determinant of the covariance matrix [2] (Theorem 8.4.1):

$$H(X_1, \dots, X_d) = \frac{1}{2} \log((2\pi e)^n |\Sigma|).$$

From this it follows that

$$I(X; Y) = H(X) + H(Y) - H(X, Y) = -\frac{1}{2} \log |\Sigma| = -\frac{1}{2} \log(1 - \rho^2). \quad (\text{S1})$$

Solving this for  $\rho$  gives

$$\rho = \pm \sqrt{1 - \exp(-2I(X; Y))},$$

from which we select the positive solution. It is not possible to extract the sign of the correlation, because the transformation  $x \mapsto -x$  preserves MI, but inverts the Pearson correlation coefficient.

### 1.3. Partial Correlation

In this case, the normally distributed random variable is  $(n + 2)$ -dimensional and its covariance matrix is

$$\Sigma = \begin{bmatrix} 1 & c & C_{XZ} \\ c & 1 & C_{YZ} \\ C_{XZ}^\top & C_{YZ}^\top & \Sigma_Z \end{bmatrix}.$$

This is a block matrix where the components denoted by a capital letter may be vectors. We denote by  $\Sigma_{..}$  the marginal covariance matrices such as

$$\Sigma_{XZ} = \begin{bmatrix} 1 & C_{XZ} \\ C_{XZ}^\top & \Sigma_Z \end{bmatrix}.$$

The partial correlation can be expressed in terms of the precision matrix  $P = \Sigma^{-1}$ , the elements of which are cofactors of  $\Sigma$ :

$$\rho_{XY \cdot Z} = -\frac{P_{12}}{\sqrt{P_{11}P_{22}}}.$$

Conditional MI can be decomposed into a sum of (multidimensional) entropies, to which the submatrices of  $\Sigma$  can be plugged into. Constant terms cancel out, leaving

$$\begin{aligned} I(X; Y | Z) &= H(X, Z) + H(Y, Z) - H(Z) - H(X, Y, Z) \\ &= \frac{1}{2} \log \left( \frac{|\Sigma_{XZ}| |\Sigma_{YZ}|}{|\Sigma_Z| |\Sigma|} \right). \end{aligned}$$

Applying the normalization formula, we get

$$\begin{aligned} \rho_{I(X; Y | Z)} &= \sqrt{1 - \exp(-2I(X; Y | Z))} \\ &= \frac{\sqrt{|\Sigma_{XZ}| |\Sigma_{YZ}| - |\Sigma_Z| |\Sigma|}}{\sqrt{|\Sigma_{XZ}| |\Sigma_{YZ}|}}. \end{aligned}$$

The denominator already matches that of partial correlation. It remains to show that the numerators are equal:

$$|P_{12}|^2 = |\Sigma_{XZ}| |\Sigma_{YZ}| - |\Sigma_Z| |\Sigma|. \quad (S2)$$

If  $Z$  is one-dimensional, the computation is easy to carry out. In the general case, we need to use block matrix results.

By a formula for block matrix determinant,

$$|P_{12}| = \begin{vmatrix} c & C_{YZ} \\ C_{XZ}^\top & \Sigma_Z \end{vmatrix} = |\Sigma_Z| (c - C_{YZ} \Sigma_Z^{-1} C_{XZ}^\top).$$

Doing the same computation for  $|\Sigma_{XZ}|$ ,  $|\Sigma_{YZ}|$  and  $|\Sigma|$  (considering  $\Sigma$  a  $2 \times 2$  block matrix, where  $\Sigma_Z$  is one block), we find that the  $|\Sigma_Z|$  terms cancel out in (1). There remain some scalar terms and a determinant of

$$\Sigma_{XY} - \begin{bmatrix} C_{XZ} \\ C_{YZ} \end{bmatrix} \Sigma_Z^{-1} \begin{bmatrix} C_{XZ}^\top & C_{YZ}^\top \end{bmatrix},$$

which is easy to compute by block matrix multiplication and the definition of  $2 \times 2$  determinant. To simplify the long expressions, it then remains to use the identities  $C_{YZ}^\top C_{XZ} = C_{XZ}^\top C_{YZ}$  and  $C_{XZ} \Sigma_Z^{-1} C_{YZ}^\top = C_{YZ} \Sigma_Z^{-1} C_{XZ}^\top$ .

## References

1. Ihara, S. *Information Theory for Continuous Systems*; World Scientific: Singapore, 1993.
2. Cover, T.M.; Thomas, J.A. *Elements of Information Theory*; Wiley-Interscience: Hoboken, NJ, USA, 2006.
