# Supplementary material
Source: MDPI journal article supplement (https://www.mdpi.com/2073-4433/13/7/1046)

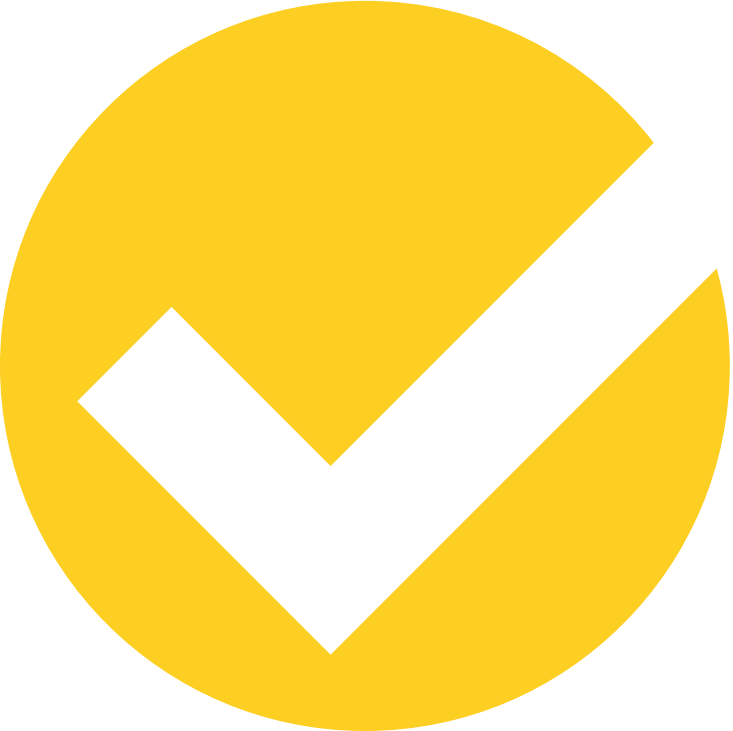

check for  
updates

Supplement: s1 [file s1]

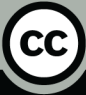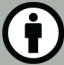

BY

Supplement: s1 [file s1]



*atmosphere*

Supplement: s1 [file s1]
